# Supplementary material for: A rectangular Ni–Fe cluster with unusual cyanide bridges
Source: Royal Society of Chemistry journal article supplement (doi:10.1039/c2dt31152f), 2012-01-01
Supplement: c2dt31152f.pdf [file c2dt31152f.pdf]

## Supporting Information

A rectangular Ni-Fe cluster with unusual cyanide bridges

Christoph Krüger, Hiroki Sato, Takuto Matsumoto, Takuya Shiga,  
Graham N. Newton, Franz Renz and Hiroki Oshio

Prof. H. Oshio  
Graduate School of Pure and Applied Sciences,  
University of Tsukuba  
Tennodai 1-1-1, Tsukuba, Ibaraki 305-8571 (Japan)  
FAX: (+81)29-852-4238  
E-mail: oshio@chem.tsukuba.ac.jp

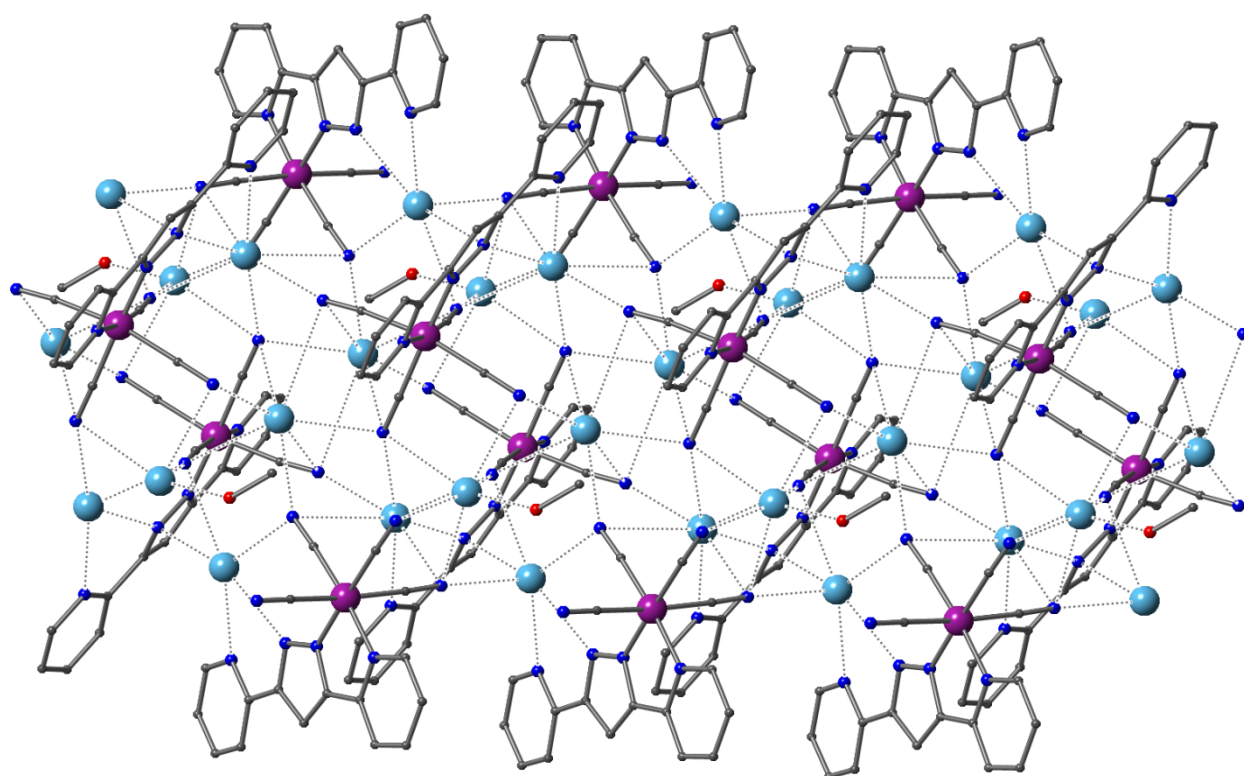

**Figure S1.** One-dimensional network along the *a* axis of  $\text{K}_2[\text{Fe}^{\text{III}}(\text{L1})(\text{CN})_4](\text{MeOH})$  (1·MeOH).

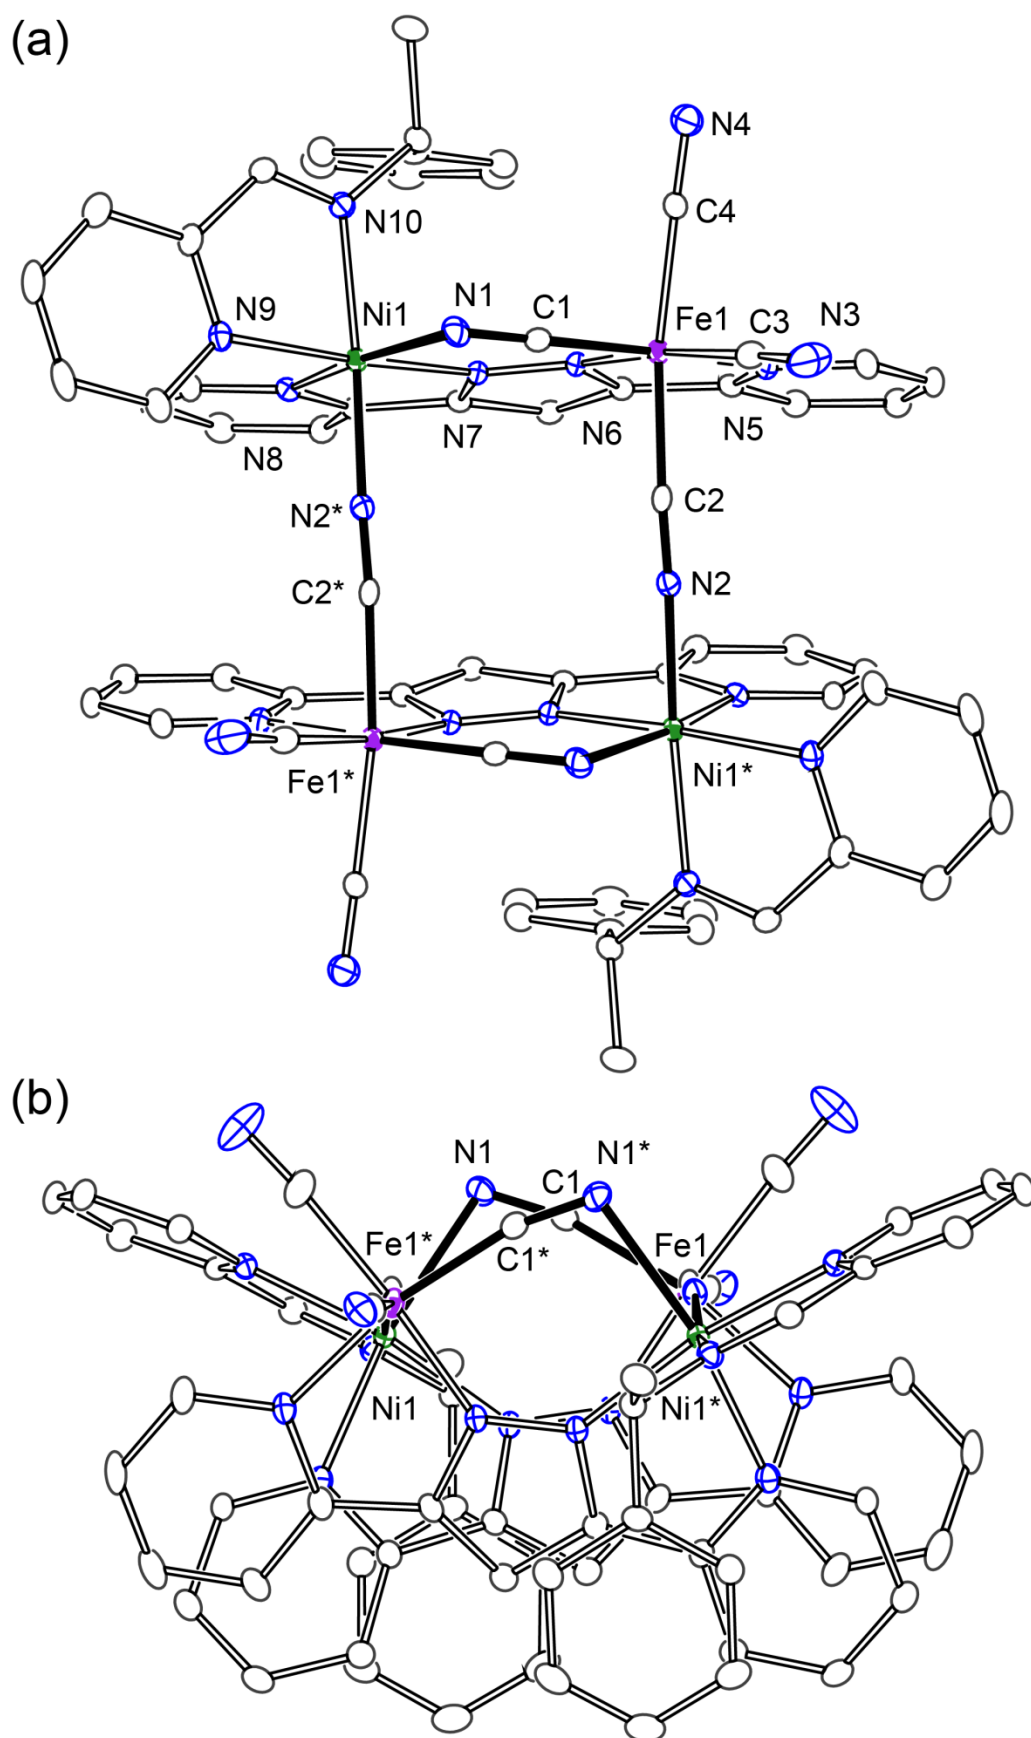

**Figure S2.** ORTEP drawing of  $\{[Ni(L2^R)]_2[Fe(L)(CN)_4]_2\} \cdot 6H_2O \cdot 2MeOH$  ( $2 \cdot 6H_2O \cdot 2MeOH$ ).

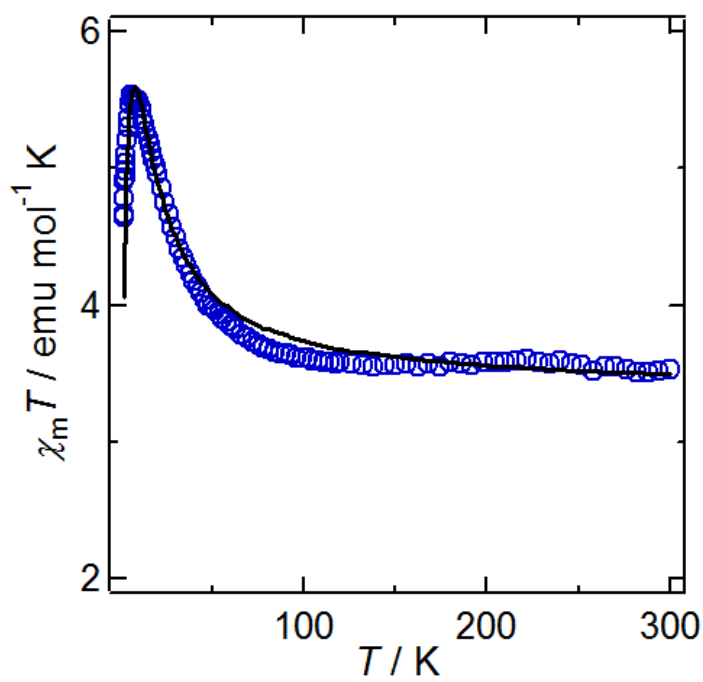

**Figure S3.**  $\chi_m T$  vs.  $T$  plot for 2.

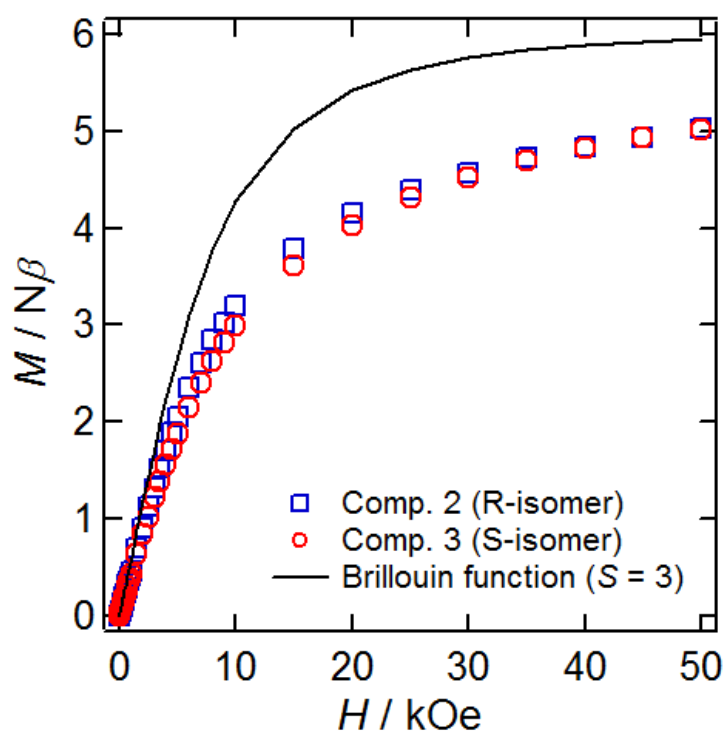

**Figure S4.**  $M$  vs.  $H$  plot of **2** (□) And **3** (○). The solid line is the indicated Brillouin function of  $S=3$ .

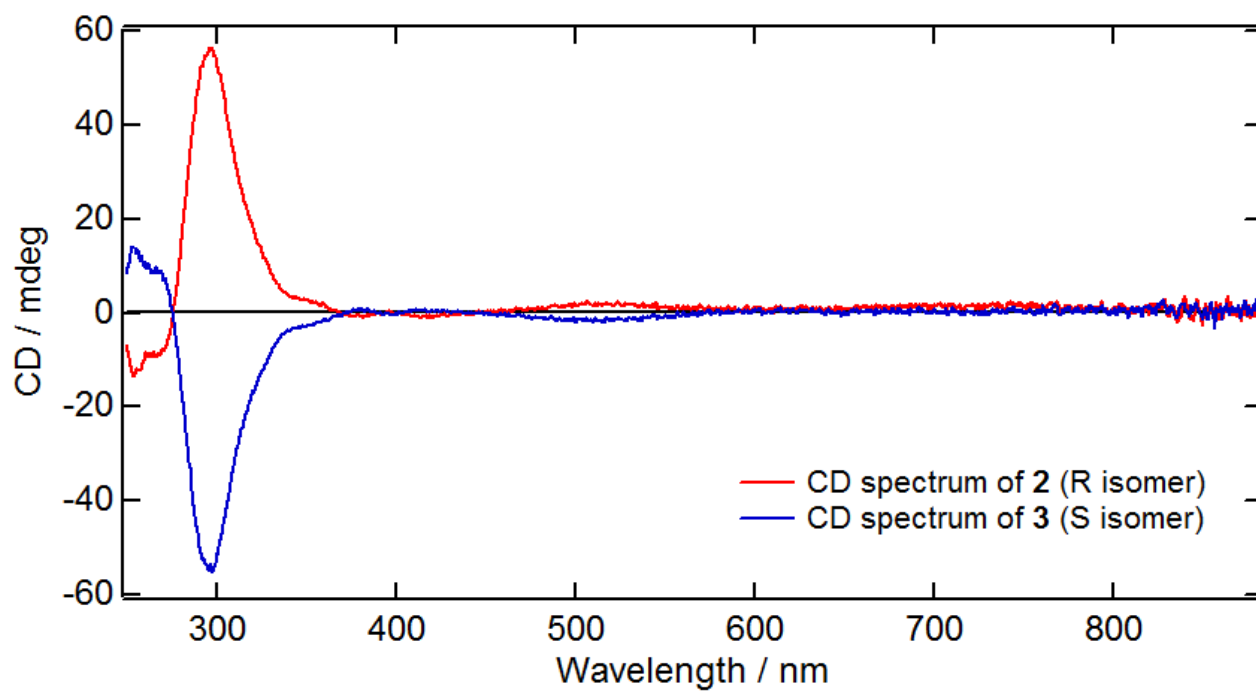

**Figure S5.** CD spectra of **2** and **3** in methanol.
